# Supplementary material for: High-Performance PCR for Alleles Discrimination of Chromo-Helicase-DNA Binding Protein (CHD1) Gene in Bird Sexing
Source: MDPI journal article supplement (doi:10.3390/biology12020300), 2023-02-14
Supplement: s1 [file s1]

Supplementary

**Table S1.** PCR conditions used in this study. Conditions that differ from T0 are shown in bold italic style.

| PCR condition Trial 0 (T0)   |       |                  |
|------------------------------|-------|------------------|
| 98 °C (Preheating)           | 20 s  |                  |
| 98 °C (Denaturation)         | 5 s   | 25 cycles        |
| 65 °C (Annealing)            | 15 s  |                  |
| 72 °C (Extension)            | 5 s   |                  |
| 98 °C (Denaturation)         | 5 s   |                  |
| 60 °C (Annealing)            | 15 s  | 15 cycles        |
| 72 °C (Extension)            | 5 s   |                  |
| 72 °C (Extension)            | 1 min |                  |
| PCR condition Trial 1 (T1)   |       |                  |
| 98 °C (Preheating)           | 20 s  |                  |
| 98 °C (Denaturation)         | 5 s   | 25 cycles        |
| <b>68 °C</b> (Annealing)     | 15 s  |                  |
| 72 °C (Extension)            | 5 s   |                  |
| 98 °C (Denaturation)         | 5 s   |                  |
| <b>58 °C ± 1</b> (Annealing) | 15 s  | 15 cycles        |
| 72 °C (Extension)            | 5 s   |                  |
| 72 °C (Extension)            | 1 min |                  |
| PCR condition Trial 2 (T2)   |       |                  |
| 98 °C (Preheating)           | 20 s  |                  |
| 98 °C (Denaturation)         | 5 s   | <b>30 cycles</b> |
| <b>62 °C</b> (Annealing)     | 15 s  |                  |
| 72 °C (Extension)            | 5 s   |                  |
| 98 °C (Denaturation)         | 5 s   |                  |
| 60 °C (Annealing)            | 15 s  | <b>10 cycles</b> |
| 72 °C (Extension)            | 5 s   |                  |
| 72 °C (Extension)            | 1 min |                  |

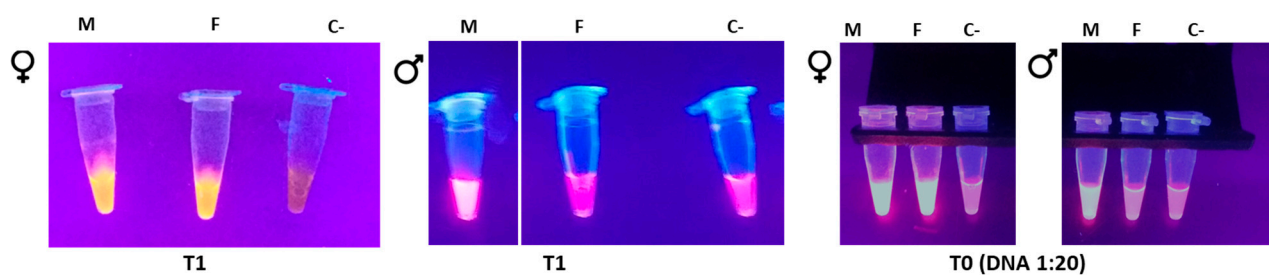

**Figure S1.** Fluorimetric detection of PCR products obtained using alternative hp-PCR conditions (T1–T2) with different annealing temperatures and cycling programs listed in Table S1, and results obtained using a 1:20 dilution of template DNA for amplification with the standard (T0) hp-PCR program (T0 DNA 1:20).
